# Supplementary material for: Delayed reinforcement of costimulation improves the efficacy of mRNA vaccines in mice
Source: JCI journal article supplement (doi:10.1172/jci183973), 2024-10-21
Supplement: sd1 [file 1]

## **Delayed reinforcement of costimulation improves effectiveness of mRNA vaccines in mice**

Sarah Sanchez<sup>1</sup>, Tanushree Dangi<sup>1</sup>, Bakare Awakoaiye<sup>1</sup>, Min Han Lew<sup>1</sup>, Nahid Irani<sup>1</sup>, Slim Fourati<sup>2</sup>, Pablo Penaloza-MacMaster\*<sup>1</sup>

<sup>1</sup>Department of Microbiology-Immunology, Feinberg School of Medicine, Northwestern University, Chicago, IL 60611, USA. <sup>2</sup>Department of Medicine, Division of Allergy and Immunology, Feinberg School of Medicine and Center for Human Immunobiology, Northwestern University, Chicago, IL 60611, USA.

### **\*Correspondence:**

Pablo Penaloza-MacMaster (ppm@northwestern.edu)

303 E. Chicago Ave. Tarry 6-728, Chicago, IL 60611

Phone: (312) 503-0357

### **Short Title:**

Delayed 4-1BB improves vaccines

Supplemental Figures:

Figure S1

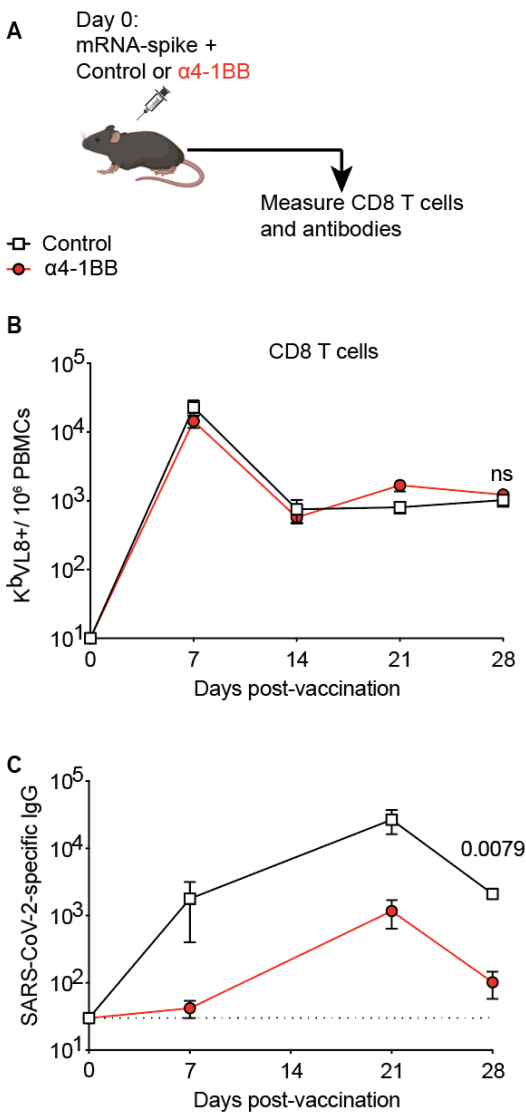

**Supplemental Figure 1. Reinforcing 4-1BB**

**costimulation on the same day of vaccination does**

**not improve immune responses.** (A) Experimental

outline for evaluating the effect of  $\alpha 4-1BB$  at day 0

of vaccination. Mice were immunized with 3  $\mu$ g of

an mRNA-spike vaccine followed by treatment with

50  $\mu$ g of  $\alpha 4-1BB$  or control antibodies on the same

day. (B) Summary of virus-specific CD8 T cells. (C)

Summary of antibody responses. Data are from one

experiment, n=5 per group; experiment was

performed twice with similar results. Indicated P

values were calculated by the Mann–Whitney test at

the last time point.

Figure S2  
 □ Control  
 ●  $\alpha$ 4-1BB

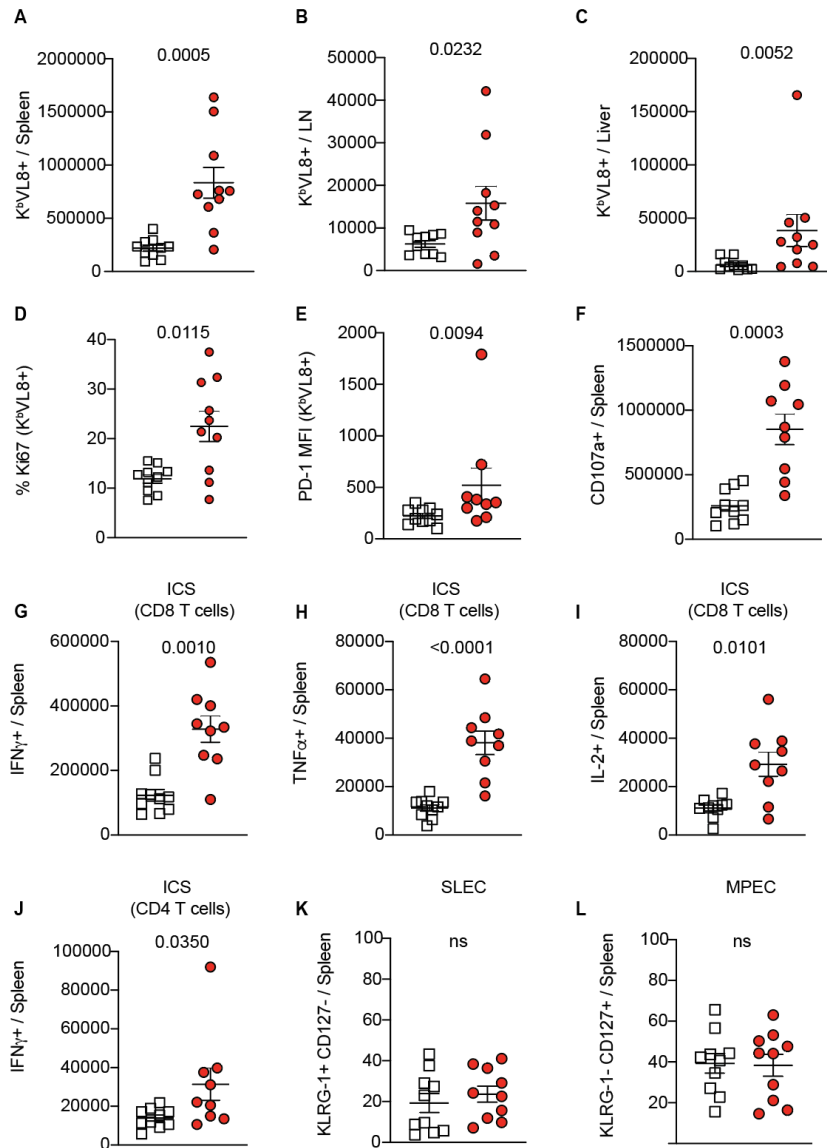

## Supplemental Figure 2.

### Virus-specific CD8 T cells

**in tissues.** Summary of CD8 T cell responses in spleen (A), lymph nodes (B), and liver (C) at day 7 post-vaccination.

Summary of Ki67 (D) and PD-1 (E) expression on splenic CD8 T cells.

Summary of CD107a (F), IFN $\gamma$  (G), TNF $\alpha$  (H), IL-2 (I) on virus-specific CD8 T cells.

Summary of IFN $\gamma$  (J) on virus-specific CD4 T cells.

Data from panels F-J are from intracellular cytokine staining (ICS) at day 15 post-

vaccination, using spike overlapping peptide pools in the presence of GolgiPlug and GolgiStop.

Summary of SLEC and MPEC subsets on splenic CD8 T cells (K<sup>b</sup>VL8+) at day 30 post-vaccination. Mice were immunized with 3  $\mu$ g of an mRNA-spike vaccine followed by treatment with 50  $\mu$ g of  $\alpha$ 4-1BB or control antibodies. Data are from two experiments, n=5 per group/experiment. Indicated P values were calculated by the Mann–Whitney test.

Figure S3

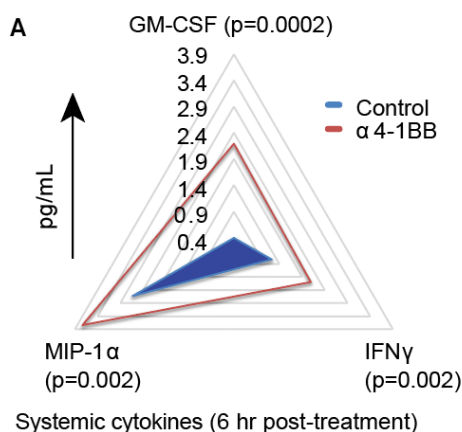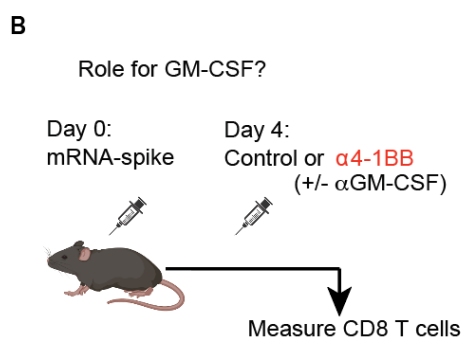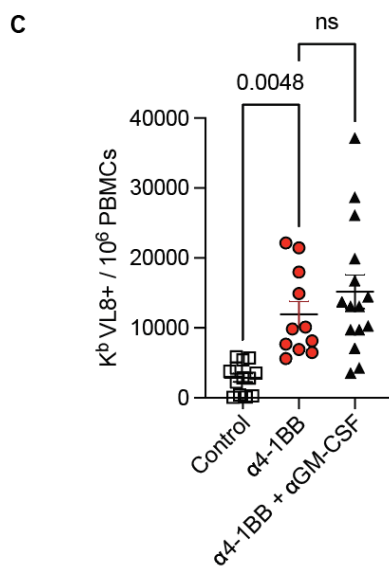

### Supplemental Figure 3. Systemic cytokines after treatment

**with 4-1BB costimulatory antibodies.** (A) Radar plots showing cytokines in serum 6 hr after treatment with 4-1BB costimulatory antibodies. 4-1BB costimulatory antibodies were administered at day 4 post-vaccination, same as in Figure 1C, and cytokines were quantified 6 hr after treatment. Data are from two experiments,  $n=5$  per group/experiment. All data are shown.

Indicated P values were calculated by the Mann–Whitney test.

(B) Experimental outline for evaluating the mechanistic role of GM-CSF in the improvement of CD8 T cells following treatment with  $\alpha$ 4-1BB. (C) Summary of CD8 T cell responses in blood at day 14 post-vaccination. Data are from two experiments,  $n=3-5$  per group/experiment. All data are shown.

Indicated P values in panel C were calculated by one-way ANOVA (multiple comparisons).

Figure S4

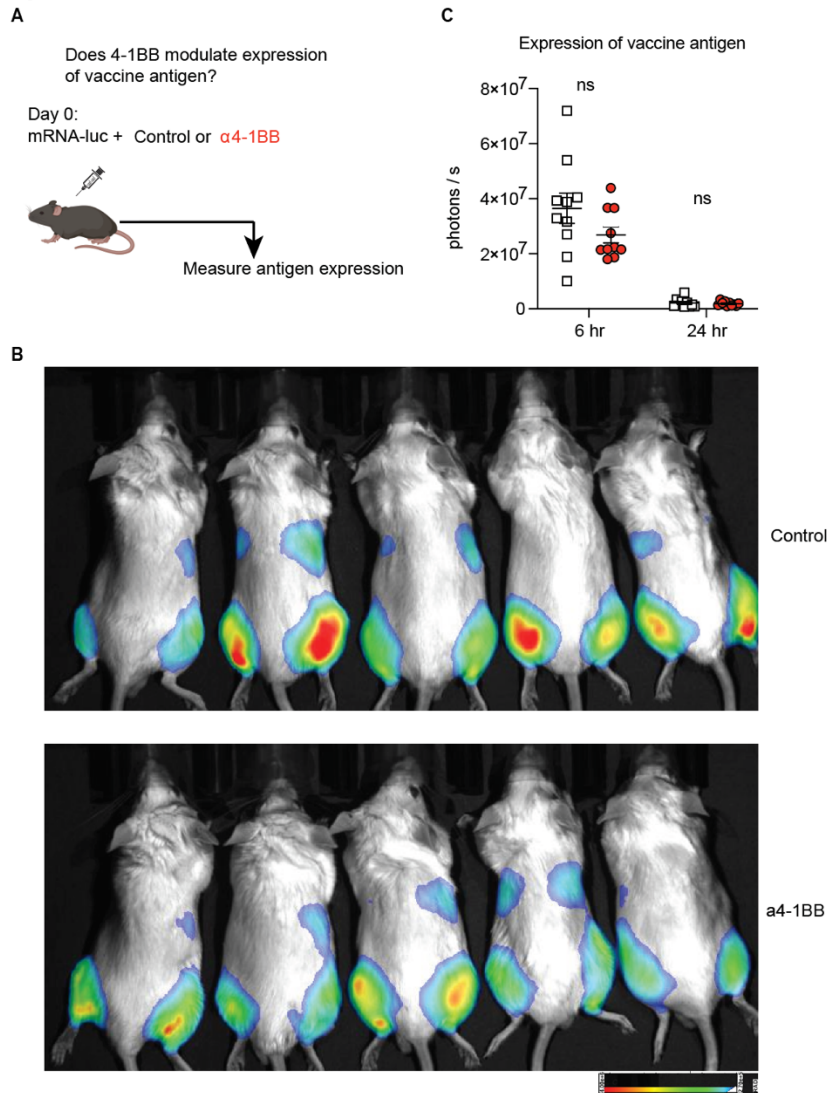

# **Supplemental Figure 4. 4-1BB costimulation does not significantly affect antigen expression following mRNA vaccination. (A)**

Experimental outline for quantifying antigen expression following reinforcement of 4-1BB costimulation. We utilized BALB/c mice, since their white coat facilitates visualization by bioluminescence. BALB/c mice were immunized intramuscularly with 3  $\mu$ g of

an mRNA-luciferase, and after 30 min, they were treated intraperitoneally with 50  $\mu$ g of  $\alpha$ 4-1BB or control antibodies. After 6 hr post-immunization, mice were injected intraperitoneally with luciferin and luciferase expression was quantified by in vivo bioluminescence. **(B)** Bioluminescence images at 6 hr post-immunization. **(C)** Summary of antigen expression by bioluminescence. Data are from one experiment, n=5 per group/experiment (each quadriceps represents a separate immunization site, equating 10 quadriceps per group). All data are shown. Indicated P values were calculated by the Mann–Whitney test.

Figure S5

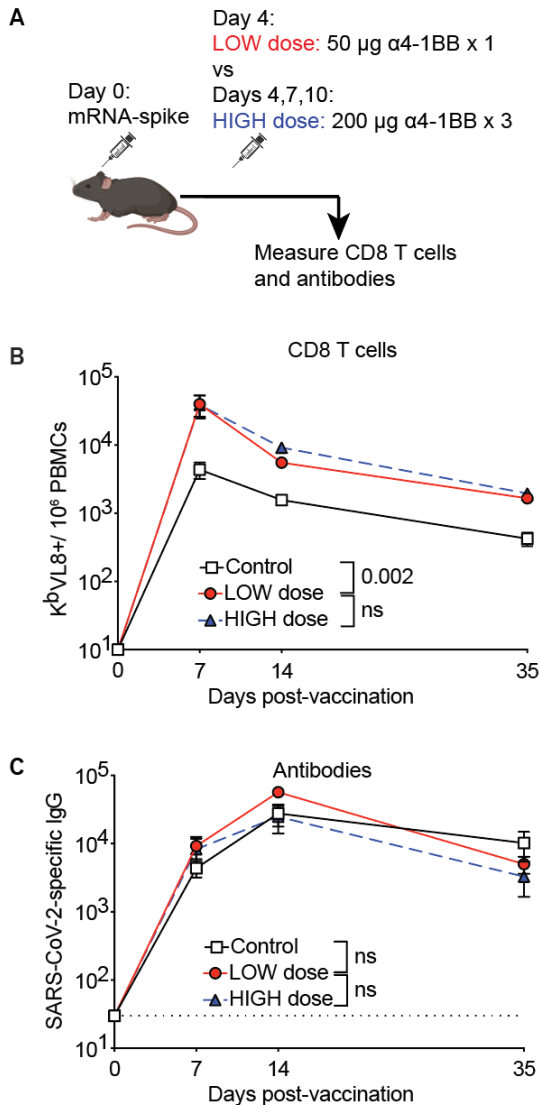

## Supplemental Figure 5. Continuously

treating with  $\alpha$ 4-1BB after day 4 does not

result in superior responses relative to

treating just once at day 4. (A) Experimental

outline for comparing the effects of  $\alpha$ 4-1BB

dose. Mice were vaccinated with 3  $\mu$ g of an

mRNA-spike vaccine. One group of mice

received a single dose of 50  $\mu$ g of  $\alpha$ 4-1BB on

day 4 (**LOW dose**); another group of mice

received 200  $\mu$ g of  $\alpha$ 4-1BB on days 4, 7, and

10 (**HIGH dose**). (B) Summary of virus-

specific CD8 T cell responses in PBMCs. (C)

Summary of antibody responses in sera. Data

are from one experiment with n=5 per group.

Indicated P values were determined by 2-way

ANOVA (Dunnett's multiple comparisons

tests) at the last time point.

Figure S6

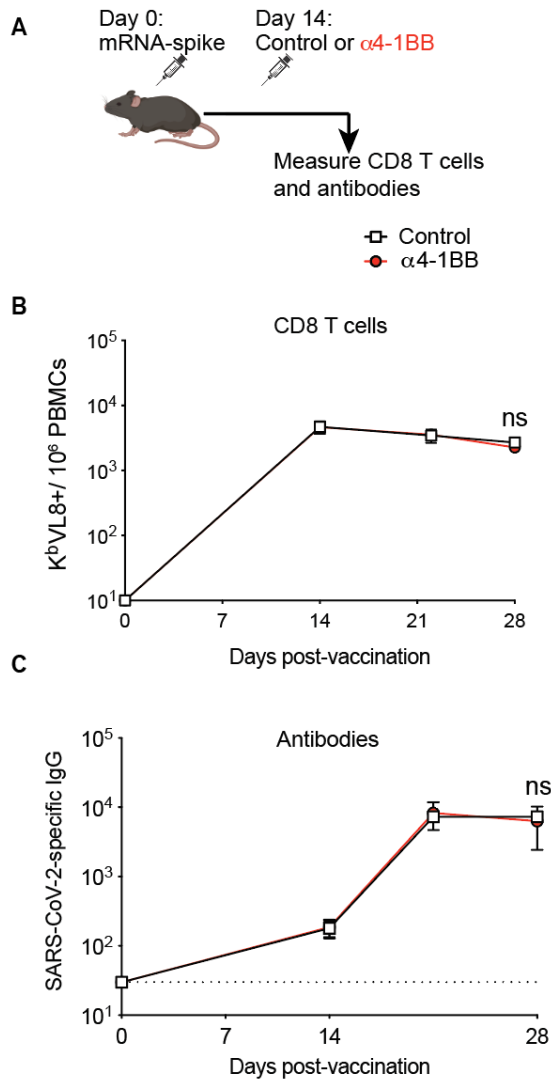

Mann–Whitney test at the last time point.

**Supplemental Figure 6.  $\alpha 4-1BB$  costimulation after day 14 does not result in improvement of immune responses following mRNA-SARS-CoV-2 vaccination.** (A) Experimental outline for evaluating whether treatment with  $\alpha 4-1BB$  after 2 weeks improves immune responses elicited by an mRNA-spike vaccine. C57BL/6 mice were immunized with 3  $\mu$ g of an mRNA-spike vaccine followed by treatment with 50  $\mu$ g of  $\alpha 4-1BB$  or control antibodies at day 14. (B) Summary of virus-specific CD8 T cell responses in PBMCs. (C) Summary of antibody responses in sera. Data are from one experiment with  $n=5$  per group. Indicated P values were calculated by the

Figure S7

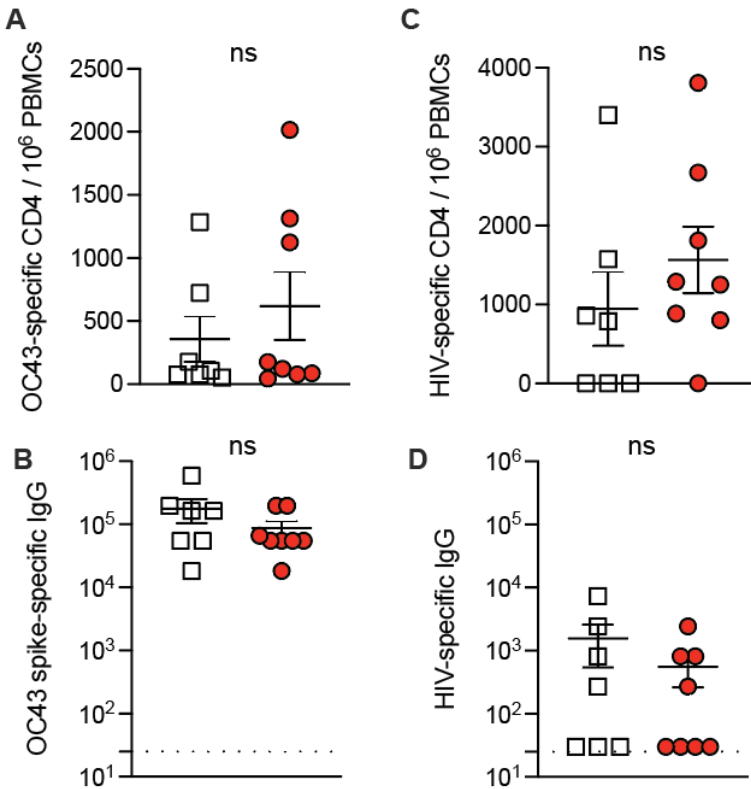

**Supplemental Figure 7. CD4 T cell and antibody responses are not significantly different following treatment with 4-1BB costimulatory antibodies at day 4. (A)** Summary of OC43 spike-specific CD4 T cell responses in PBMCs. **(B)** Summary of OC43 spike-specific antibody responses in sera. **(C)** Summary of HIV env-specific CD4 T cell responses in PBMCs. **(D)** Summary of HIV

env-specific antibody responses in sera. Mice were immunized with 3 µg of each respective mRNA vaccine followed by treatment with 50 µg α4-1BB or control antibodies at day 4. Data from panels A and C are after intracellular cytokine stimulation using overlapping peptide pools (IFNγ+). Data are from day 14 post-vaccination. Data are from two experiments, one with n=5 per group/experiment and another one with n=2-3 per group/experiment. All data are shown. Indicated P values were calculated by the Mann–Whitney test.



Figure S8

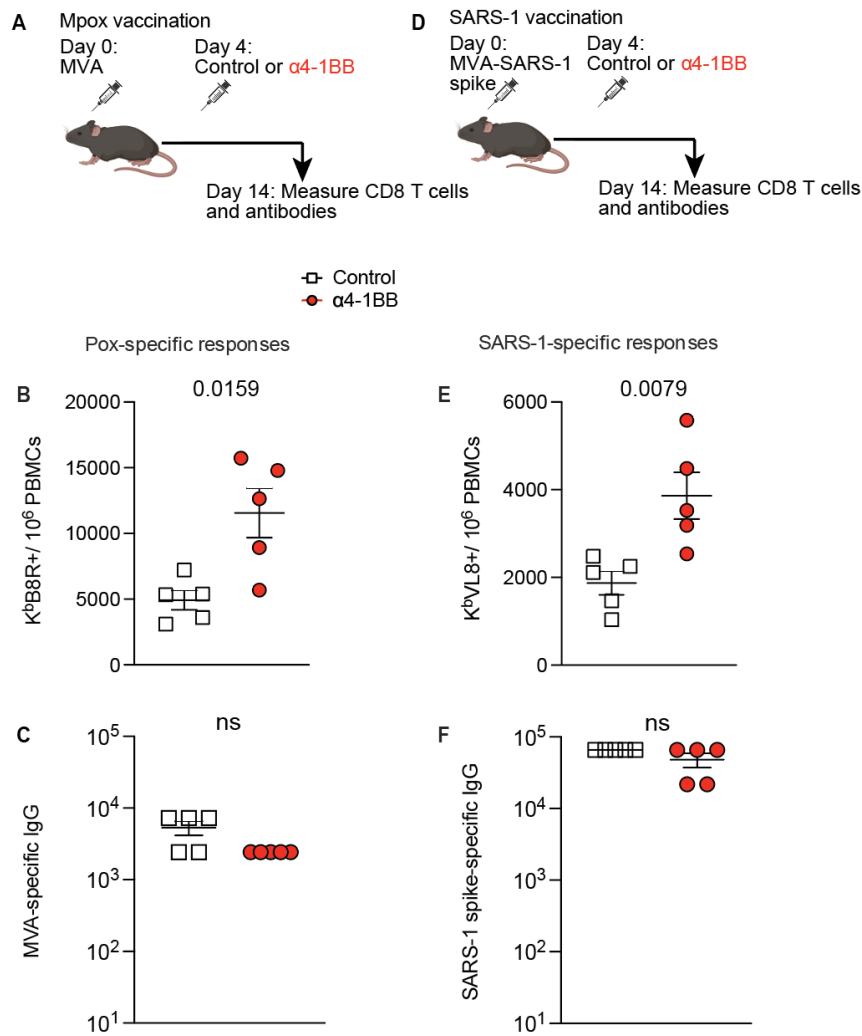

## Supplemental Figure 8.

**Generalizability to another vaccine platform: a poxvirus vector. (A)** Experimental outline for evaluating whether treatment with  $\alpha 4$ -1BB improves immune responses elicited by an MVA vaccine. **(B)** Summary of MVA-specific CD8 T cell responses in PBMCs. **(C)** Summary of MVA-specific antibody responses in sera. **(D)**

Experimental outline for evaluating whether treatment with  $\alpha 4$ -1BB improves immune responses elicited by an MVA-SARS-CoV-1 vaccine. **(E)** Summary of SARS-CoV-1 specific CD8 T cell responses in PBMCs. **(F)** Summary of SARS-CoV-1-specific antibody responses in sera. Mice were vaccinated with  $10^7$  PFU of the respective MVA vector followed by treatment with 50  $\mu$ g of  $\alpha 4$ -1BB or control antibodies at day 4. Data are from day 14 post-vaccination. Data are from one experiment,  $n=5$  per group. Indicated P values were calculated by the Mann–Whitney test.

Figure S9

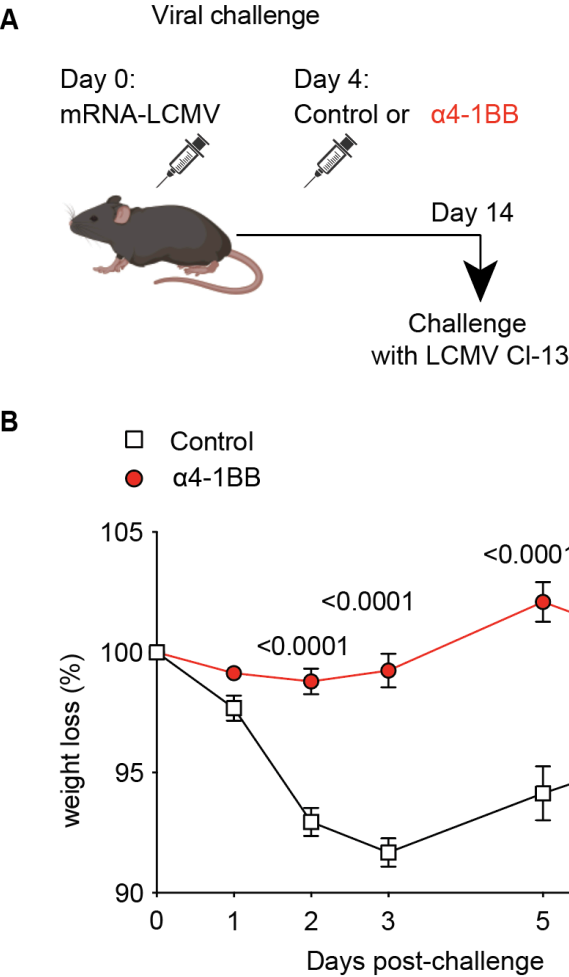

Supplemental Figure 9.

Reinforcing 4-1BB

costimulation 4 days after

mRNA-LCMV vaccination

prevents weight loss after

chronic LCMV CI-13

challenge. (A) Experimental

outline to examine if treatment

with  $\alpha 4-1BB$  at day 4 improves

immune protection conferred by

an mRNA-LCMV vaccine (same

mice from Figure 4A-4B). (B)

Summary of weight loss after

LCMV CI-13 challenge. Data are

from two experiments, each with

n=5 per group/experiment. Indicated P values were calculated by the Mann–Whitney test.

Figure S10

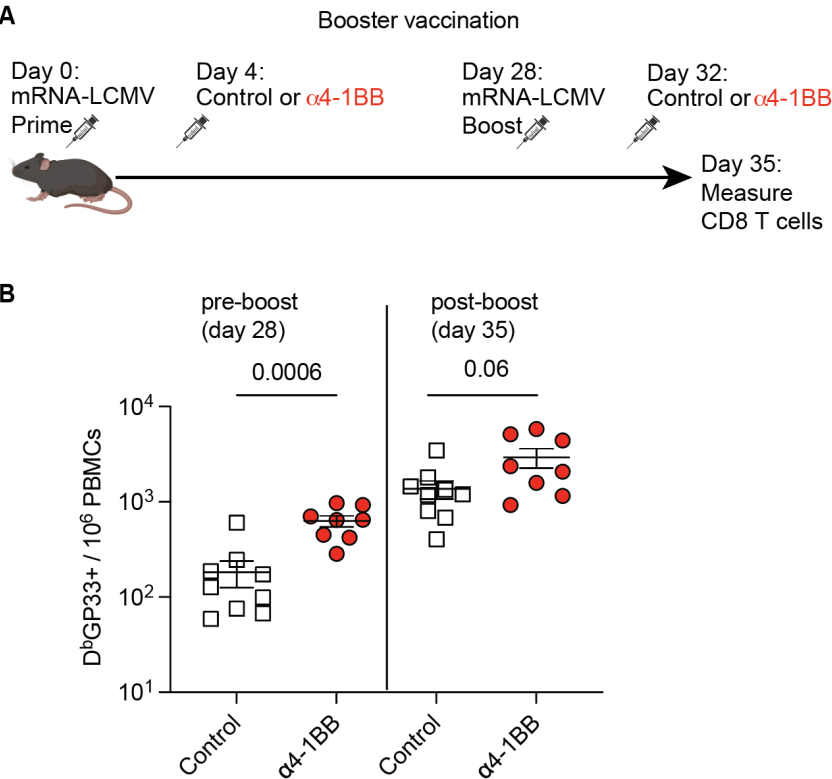

**Supplemental Figure 10.**

**Effect of reinforcing 4-1BB costimulation in a prime-boost vaccine regimen.**

**(A)** Experimental

outline to examine the effects of  $\alpha 4$ -1BB during a recall response. Mice were primed with 3  $\mu$ g of an mRNA-LCMV vaccine followed by treatment with 50  $\mu$ g of  $\alpha 4$ -1BB or control antibodies at day 4 post-

prime. At day 28 post-prime, mice were boosted homologously and treated with 50  $\mu$ g of  $\alpha 4$ -1BB or control antibodies at day 4 post-boost. **(B)** Summary of LCMV-specific CD8 T cell responses in PBMCs. Data are from two experiments, with n=4-5 per group/experiment. All data are shown. Indicated P values were calculated by the Mann-Whitney test.

Figure S11

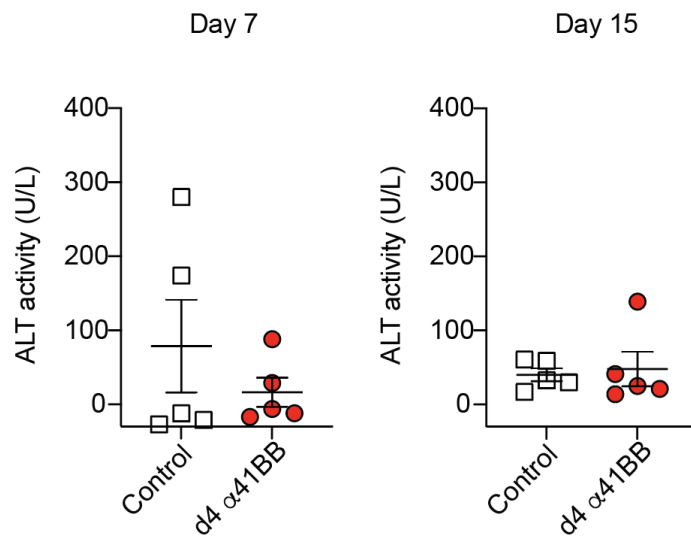

Supplemental Figure 11.

**Treatment with  $\alpha$ 4-1BB antibody at day 4 post-vaccination does not increase alanine aminotransferase (ALT) activity in sera relative to control vaccinated mice.** Mice were immunized with 3  $\mu$ g of mRNA-spike vaccine followed by treatment with a single dose of  $\alpha$ 4-1BB (50  $\mu$ g) or

control antibodies at day 4. ALT activity was quantified in sera after vaccination. Data are from one experiment, with n=5 per group. Indicated P values were calculated using the Mann–Whitney test.

Figure S12

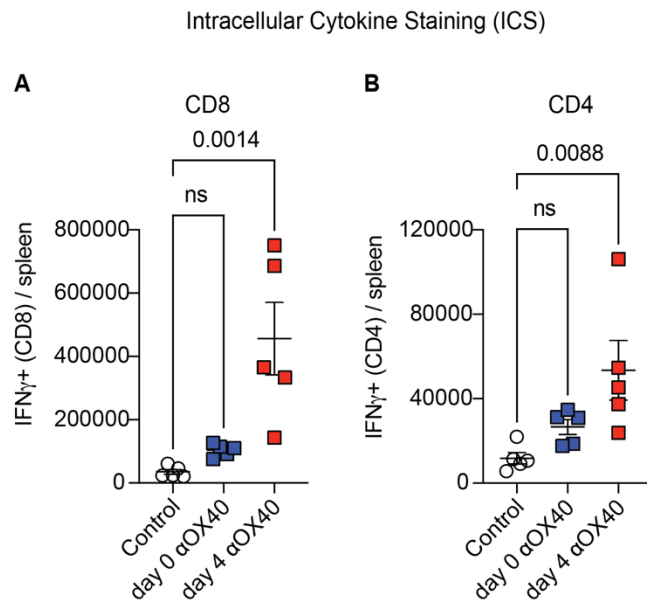

with n=5 per group. Indicated P values were calculated by the Mann–Whitney test.

**Supplemental Figure 12. Cytokine expression on virus-specific CD8 and CD4 T cells after reinforcing OX40 costimulation.** The experimental outline was identical to that of Figure 6C. Splenic CD8 T cells (**A**) and CD4 T cells (**B**) responses at day 30 post-vaccination are shown. Data are after intracellular cytokine stimulation using overlapping peptide pools (IFN $\gamma$ +). Data are from one experiment,

Figure S13

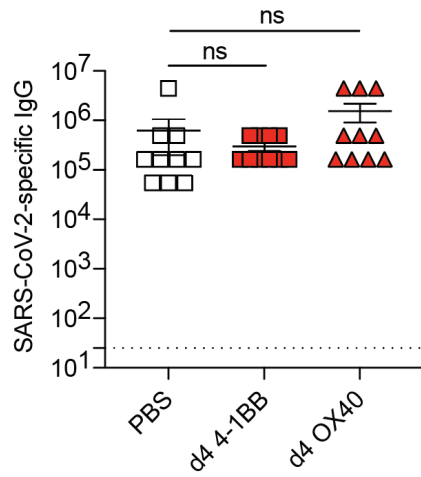

**Supplemental Figure 13. Comparative analyses of antibody responses following  $\alpha$ 4-1BB or  $\alpha$ OX40 treatment.** The experimental outline was identical to that of Figs. 1A and 6C. Antibody responses in sera at day 15 post-vaccination are shown. Data are from two experiments, with n=5 per group. Indicated P values were calculated by the Kruskal Wallis test (Dunn's multiple comparisons).
